# Supplementary material for: Single B-vacancy enriched α1-borophene sheet: an efficient metal-free electrocatalyst for CO2 reduction
Source: Royal Society of Chemistry journal article supplement (doi:10.1039/d3cp01866k), 2023-01-01
Supplement: d3cp01866k1.pdf [file d3cp01866k1.pdf]

# Supporting information for: **Single B-Vacancy Enriched $\alpha_1$ -Borophene Sheet: An Efficient Metal-Free Electrocatalyst for CO<sub>2</sub> Reduction**

Prodyut Roy,<sup>†</sup> Sourav Ghoshal,<sup>†</sup> Anup Pramanik,<sup>‡</sup> and Pranab Sarkar<sup>\*,†</sup>

*Department of Chemistry, Visva-Bharati University, Santiniketan - 731235, India, and*

*Department of Chemistry, Sidho-Kanho-Birsha University, Purulia - 723104, India*

E-mail: pranab.sarkar@visva-bharati.ac.in

---

\*To whom correspondence should be addressed

<sup>†</sup>Visva-Bharati University

<sup>‡</sup>Sidho-Kanho-Birsha University

Table S1: Values of zero-point energy (ZPE) and TS at T = 298.15 K for different adsorbed intermediates for C<sub>1</sub>-reduction of CO<sub>2</sub> over the  $\alpha_{1-t1}$ -borophene surface in the units of eV.

| Species                | Gas Phase |      | Solvent Phase |      |
|------------------------|-----------|------|---------------|------|
|                        | ZPE       | TS   | ZPE           | TS   |
| *CO <sub>2</sub>       | 0.34      | 0.13 | 0.34          | 0.13 |
| *COOH                  | 0.67      | 0.14 | 0.67          | 0.15 |
| HCOO*                  | 0.67      | 0.13 | 0.67          | 0.13 |
| *CO                    | 0.22      | 0.15 | 0.22          | 0.15 |
| H <sub>2</sub> COO*    | 0.98      | 0.13 | 0.98          | 0.13 |
| *CHO                   | 0.48      | 0.17 | 0.49          | 0.16 |
| H <sub>2</sub> C(OH)O* | 1.28      | 0.15 | 1.29          | 0.15 |
| *CH <sub>2</sub> O     | 0.89      | 0.08 | 0.84          | 0.08 |
| *CH <sub>2</sub> OH    | 1.11      | 0.18 | 1.11          | 0.18 |
| *OCH <sub>3</sub>      | 1.11      | 0.15 | 1.11          | 0.14 |
| *CH <sub>2</sub>       | 0.67      | 0.08 | 0.67          | 0.09 |
| *CH <sub>3</sub>       | 0.98      | 0.12 | 0.97          | 0.12 |
| *O + *CH <sub>4</sub>  | 1.30      | 0.26 | 1.31          | 0.25 |
| *OH                    | 0.38      | 0.07 | 0.38          | 0.07 |

Table S2: Values of zero-point energy (ZPE) and TS at T = 298.15 K for different adsorbed intermediates for C<sub>2</sub>-reduction of CO<sub>2</sub> over the  $\alpha_{1-t1}$ -borophene surface in the units of eV.

| Species                               | Gas Phase |      | Solvent Phase |      |
|---------------------------------------|-----------|------|---------------|------|
|                                       | ZPE       | TS   | ZPE           | TS   |
| *CO + *CO                             | 0.45      | 0.28 | 0.45          | 0.28 |
| *[C(O)- -CO]                          | 0.40      | 0.24 | 0.41          | 0.22 |
| *[C(O)CO]                             | 0.45      | 0.22 | 0.46          | 0.20 |
| *[C(OH)CO]                            | 0.77      | 0.20 | 0.77          | 0.20 |
| *[CCO]                                | 0.34      | 0.21 | 0.34          | 0.20 |
| *[CHCO]                               | 0.61      | 0.17 | 0.61          | 0.17 |
| *[CHCOH]                              | 0.96      | 0.15 | 0.96          | 0.15 |
| *[CHCHO]                              | 0.98      | 0.13 | 0.98          | 0.13 |
| *[CHCHOH]                             | 1.27      | 0.13 | 1.27          | 0.17 |
| *[CH <sub>2</sub> CHO]                | 1.25      | 0.18 | 1.24          | 0.12 |
| *[CH <sub>2</sub> CHOH]               | 1.55      | 0.25 | 1.55          | 0.16 |
| *[CH <sub>3</sub> CHO]                | 1.52      | 0.25 | 1.51          | 0.23 |
| *[CH <sub>2</sub> CH <sub>2</sub> OH] | 1.87      | 0.26 | 1.87          | 0.27 |
| *[CH <sub>3</sub> CH <sub>2</sub> O]  | 1.87      | 0.27 | 1.87          | 0.27 |
| *[CHC]                                | 0.53      | 0.08 | 0.53          | 0.08 |
| *[CHCH]                               | 0.85      | 0.08 | 0.85          | 0.08 |
| *[CH <sub>2</sub> CH]                 | 1.17      | 0.06 | 1.17          | 0.06 |
| *[CH <sub>2</sub> CH <sub>2</sub> ]   | 1.47      | 0.11 | 1.47          | 0.12 |
| *[CH <sub>3</sub> CH <sub>2</sub> ]   | 1.74      | 0.20 | 1.74          | 0.20 |

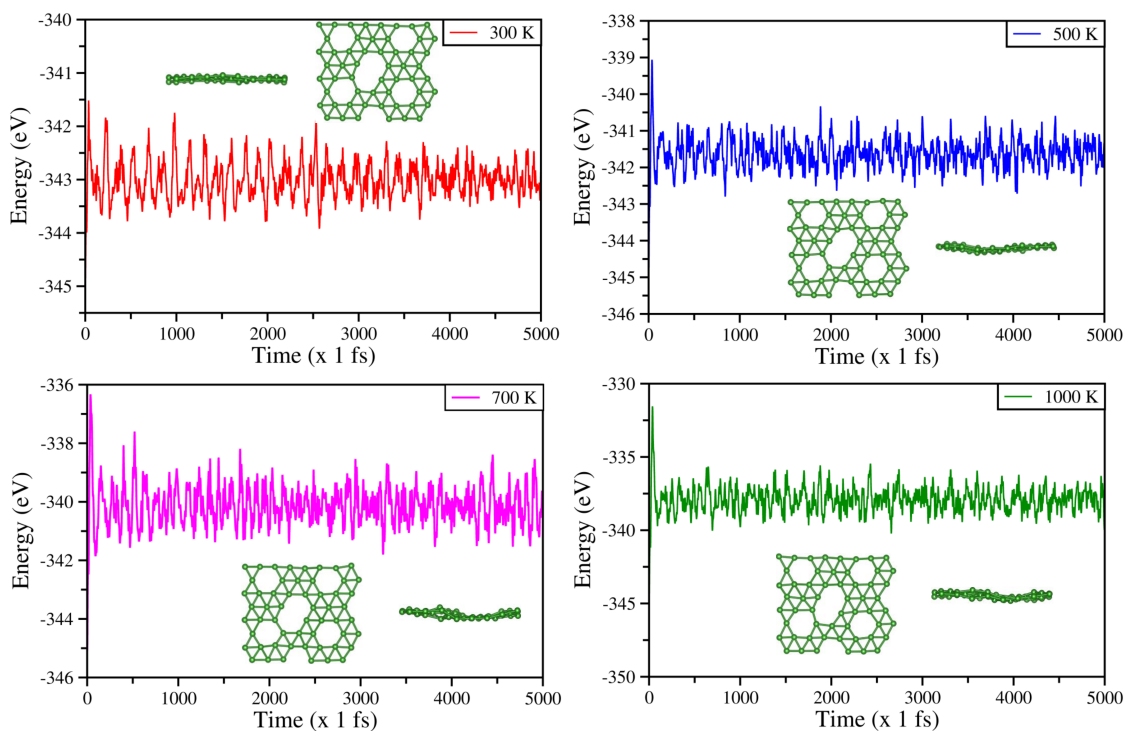

Figure S1: Energy variation plots with time for AIMD simulations of  $\alpha_{1-t}1$ -borophene run at 300 K, 500 K, 700 K and 1000 K for 5 ps with a timestep of 1 fs. In the insets of each plot, top and side views of final configurations of  $\alpha_{1-t}1$ -borophene sheet after 5 ps are shown.

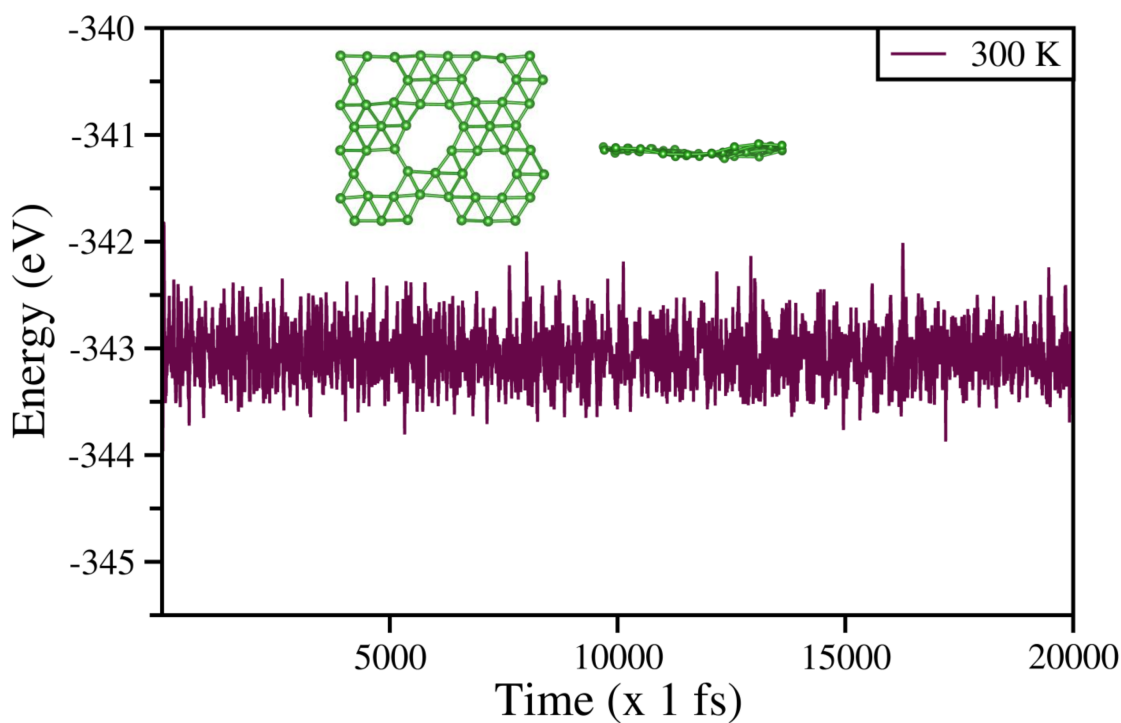

Figure S2: Energy variation plot with time for AIMD simulation of  $\alpha_{1-t1}$ -borophene run at 300 K for 20 ps with a timestep of 1 fs. In the inset of the plot, top and side views of final configurations of  $\alpha_{1-t1}$ -borophene sheet after 20 ps are shown.

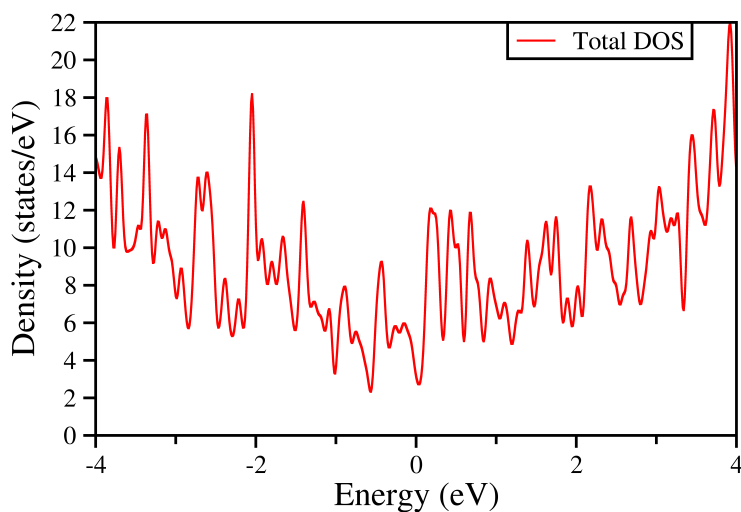

Figure S3: Electronic total density of states plot of  $\alpha_{1-t1}$ -borophene calculated from HSE06 level of theory (the Fermi level is shifted to zero).

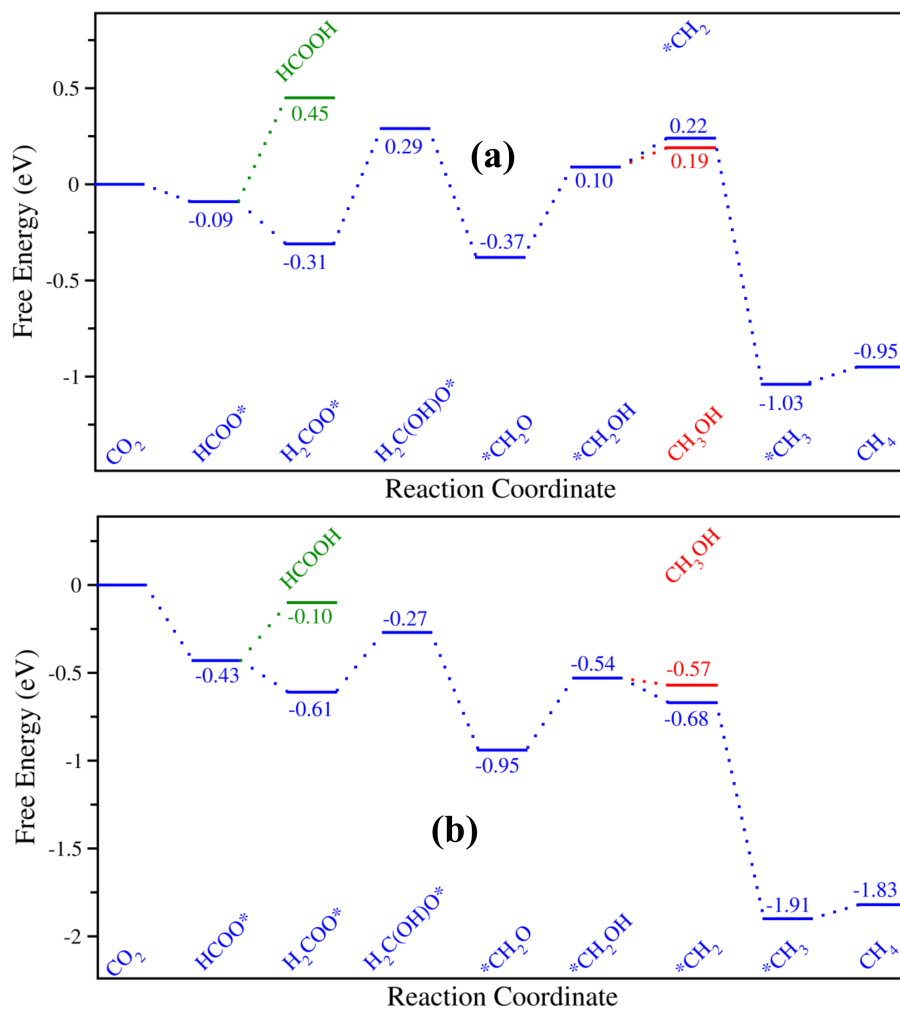

Figure S4: Relative free energy diagram for conversion of CO<sub>2</sub> into C<sub>1</sub>-products (HCOOH, CH<sub>3</sub>OH and CH<sub>4</sub>) via formation of HCOO intermediate over the  $\alpha_{1-t1}$ -borophene surface, calculated in (a) gas phase and (b) solvent phase.

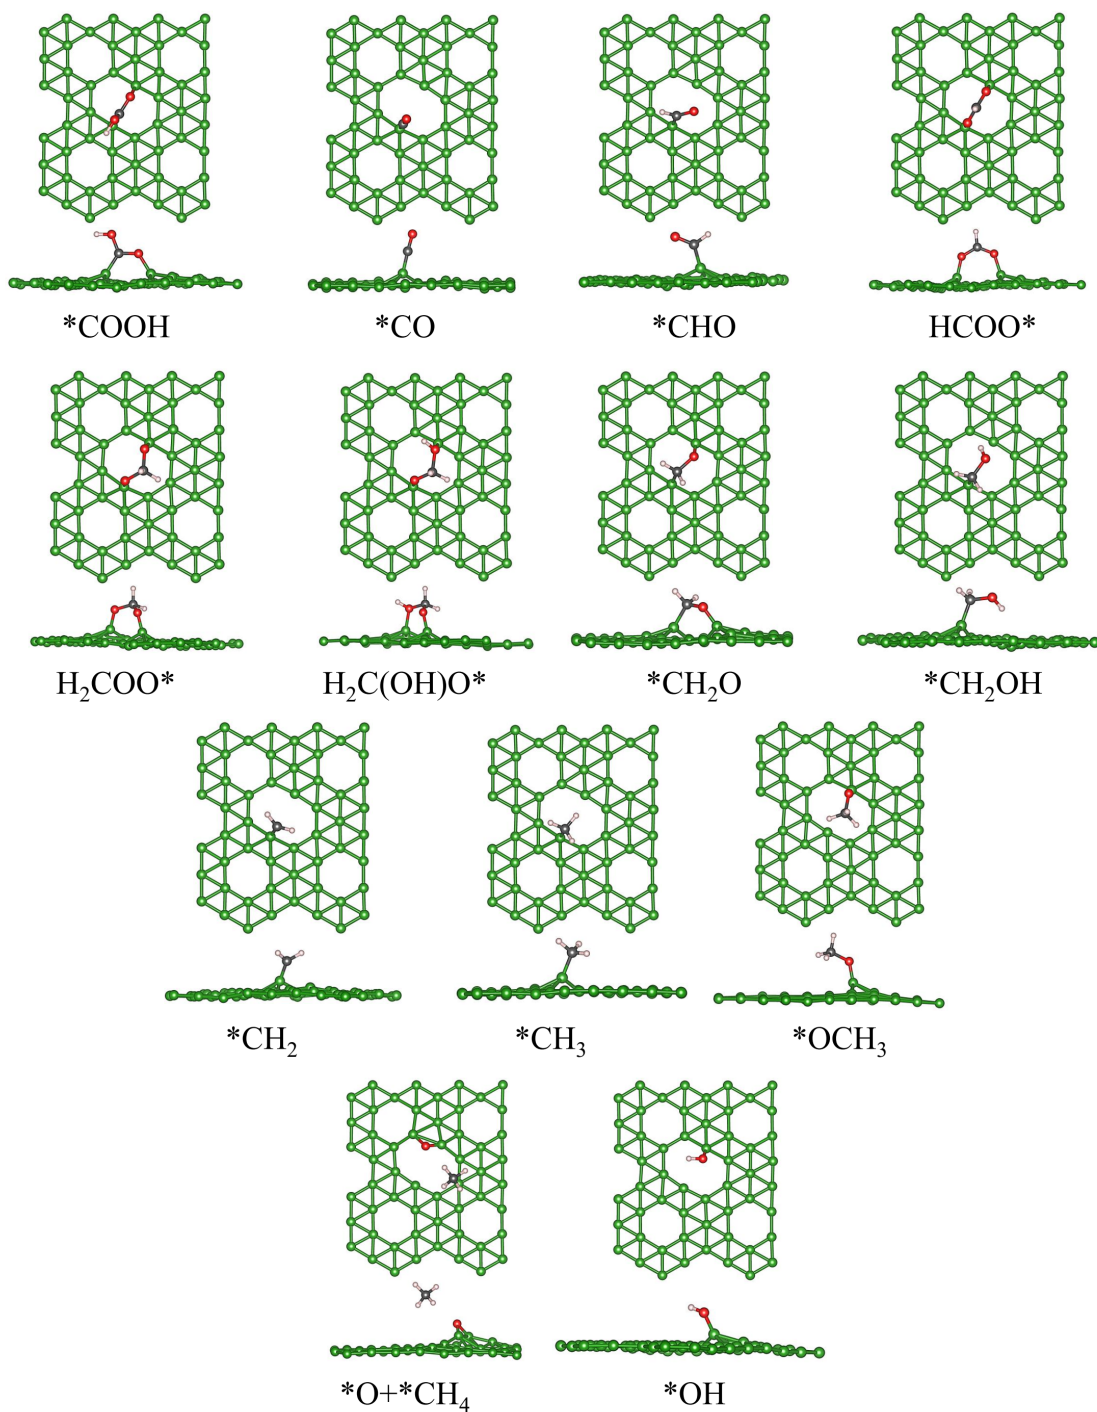

Figure S5: Electronic structures of intermediates for conversion of adsorbed CO<sub>2</sub> leading to C<sub>1</sub>-products. The green, grey, red and white balls represent B, C, O and H atoms respectively.

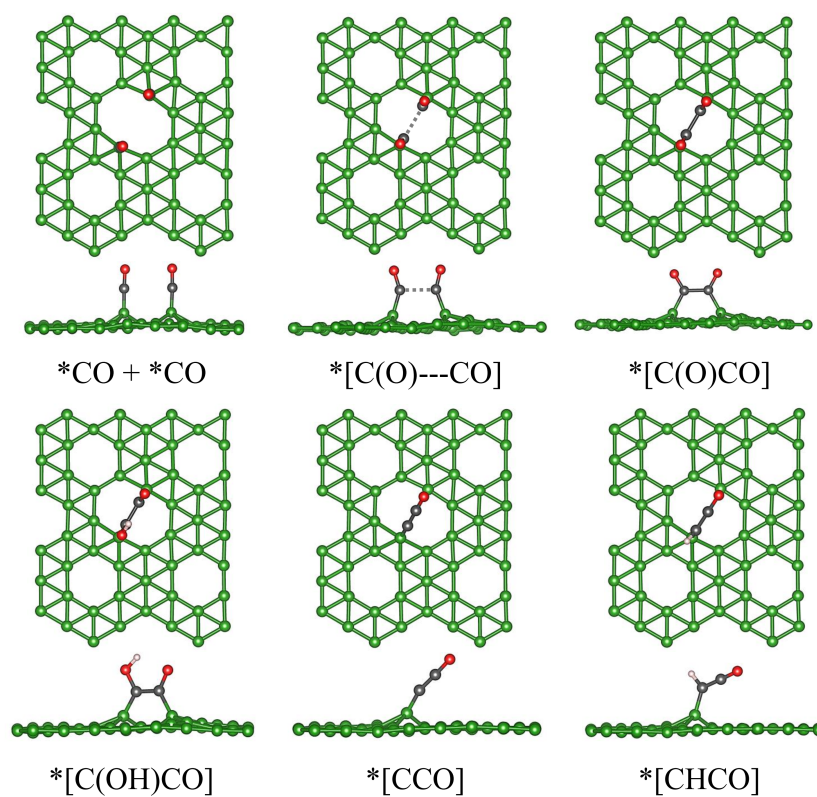

Figure S6: Optimized geometries of transition state and intermediates for coupling of two adsorbed CO followed by further conversion into adsorbed CHCO intermediate. The green, grey, red and white balls represent B, C, O and H atoms respectively.



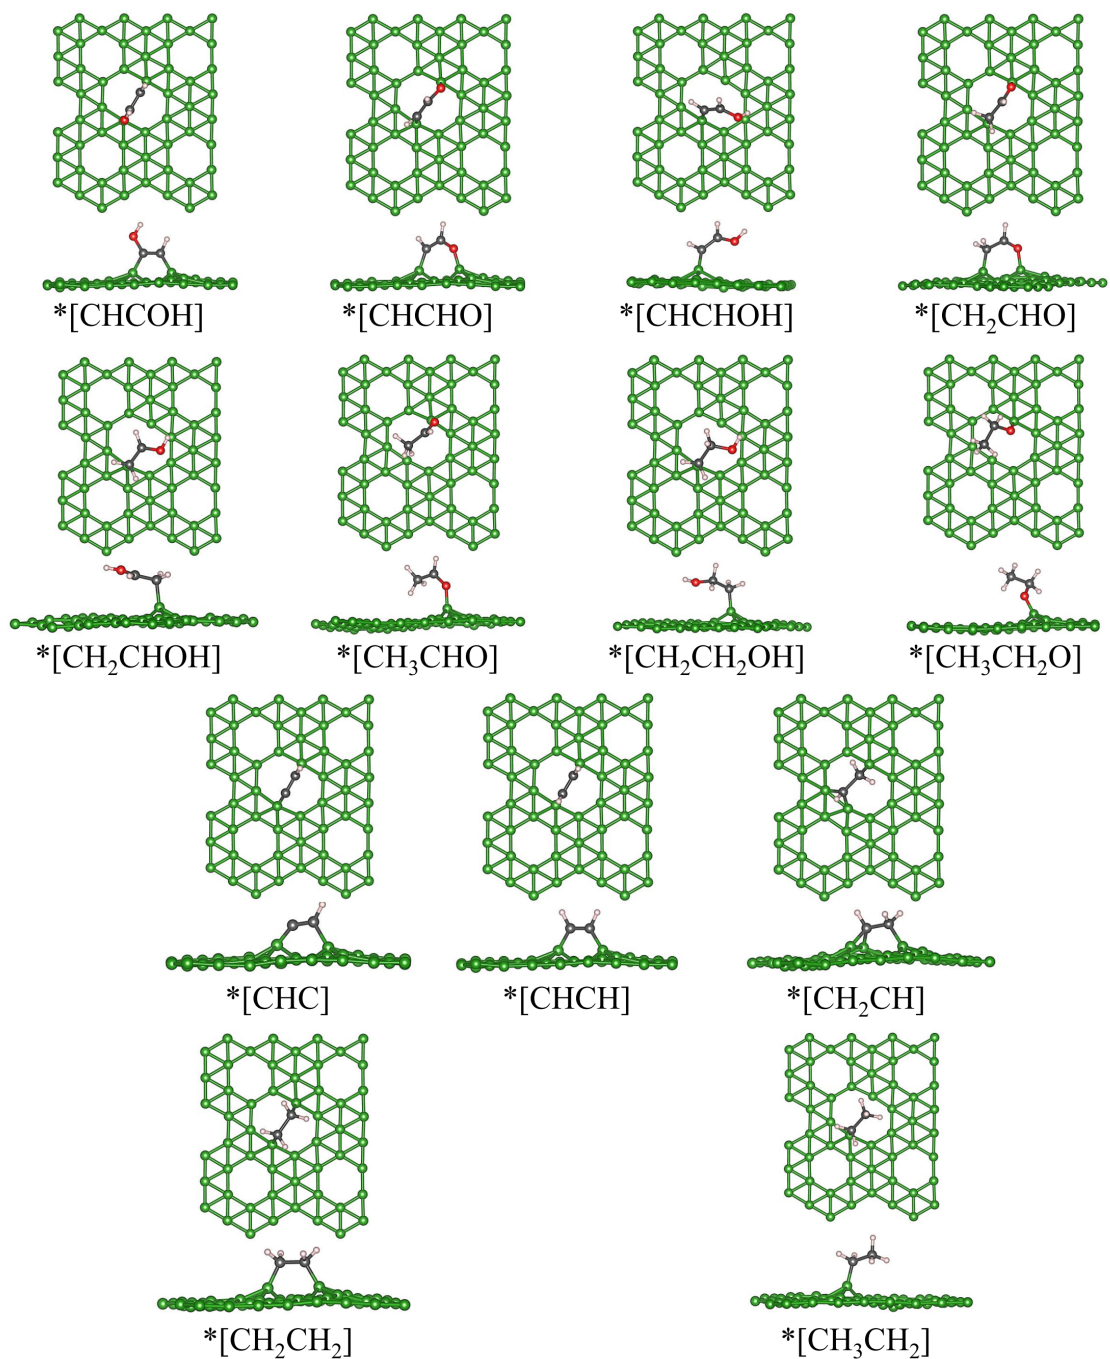

Figure S7: Optimized geometries of intermediates for the hydrogenations of  $*[CHCO]$  leading to  $C_2$ -products. The green, grey, red and white balls represent B, C, O and H atoms, respectively.
